# Supplementary material for: Development and preliminary evaluation of a 90 K Axiom® SNP array for the allo-octoploid cultivated strawberry Fragaria × ananassa
Source: PubMed Central journal article supplement (PMC4374422; doi:10.1186/s12864-015-1310-1), 2015-03-07
Supplement: 12864_2015_1310_MOESM3_ESM.pdf [file 12864_2015_1310_MOESM3_ESM.pdf]

# Di-allelic SNP

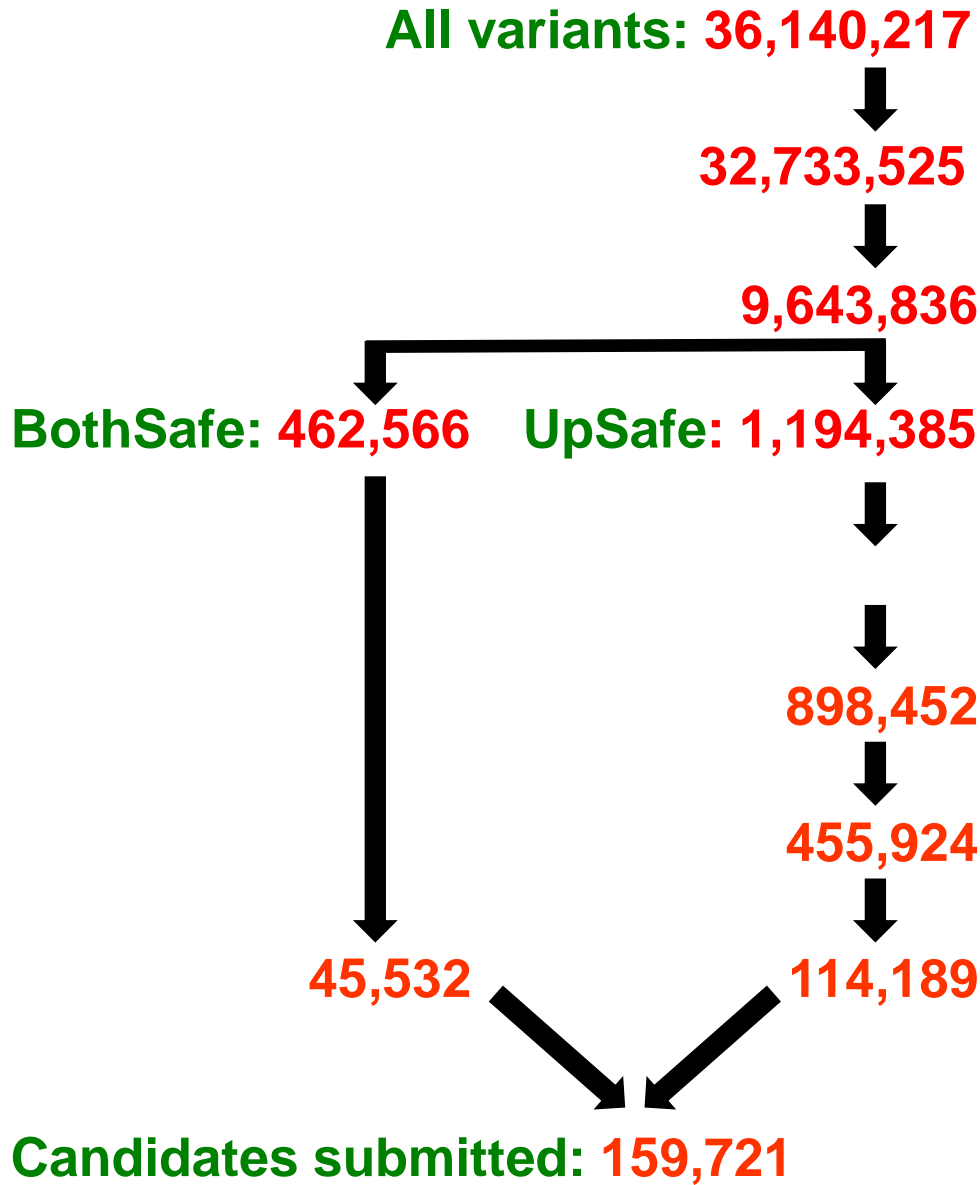

## Pipeline steps

1. Retain only *snp* variants.
2. Min. variant read count ( $x=3$ ).
3. UpSafe-DownSafe (24 +/-).
4. A/T – G/C exclusion.
5. Min. GDP presence ( $y = 2$ ).
6. Min. HD-20 absence ( $z = 2$ ).
7. CDS
