# Supplementary material for: Development and preliminary evaluation of a 90 K Axiom® SNP array for the allo-octoploid cultivated strawberry Fragaria × ananassa
Source: PubMed Central journal article supplement (PMC4374422; doi:10.1186/s12864-015-1310-1), 2015-03-07
Supplement: 12864_2015_1310_MOESM4_ESM.pdf [file 12864_2015_1310_MOESM4_ESM.pdf]

# Multi-allelic SNP

All variants: 36,140,217

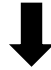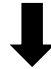

Candidate positions: 10,619,615

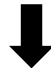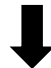

18,748

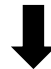

5,947

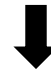

1,976

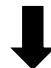

1,962

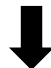

Candidates submitted: 1,940

## Pipeline steps

1. Min. variant read count ( $x = 3$ ).
2. All unique variant positions.
3. UpSafe-DownSafe (24 +/-).
4. Multi-allelic SNPs – BothSafe.
5. CDS.
6. Min. variant read count ( $x = 3$ ).
7. Min. HD-16 presence ( $y = 2$ ).
8. Min. HD-20 absence ( $z = 2$ ).
