# Supplementary material for: Development and preliminary evaluation of a 90 K Axiom® SNP array for the allo-octoploid cultivated strawberry Fragaria × ananassa
Source: PubMed Central journal article supplement (PMC4374422; doi:10.1186/s12864-015-1310-1), 2015-03-07
Supplement: 12864_2015_1310_MOESM5_ESM.pdf [file 12864_2015_1310_MOESM5_ESM.pdf]

# Di-allelic Indel

All variants: 36,140,217

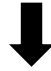

2,135,409

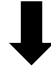

1,193,870

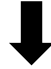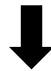

UpSafe+DownSafe+BothSafe: 46,009

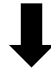

17,812

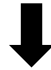

Candidates submitted: 12,801

## Pipeline steps

1. Indels only (1 to 6 bp): *ins* or *del*.
2. Min. variant read count ( $x = 2$ ).
3. UpSafe-DownSafe (24 + / 30 -).
4. Indel size  $\geq 3$ .
5. Genic.
6. Min. HD-20 absence ( $z = 2$ ).
