# Supplementary material for: Development and preliminary evaluation of a 90 K Axiom® SNP array for the allo-octoploid cultivated strawberry Fragaria × ananassa
Source: PubMed Central journal article supplement (PMC4374422; doi:10.1186/s12864-015-1310-1), 2015-03-07
Supplement: 12864_2015_1310_MOESM6_ESM.pdf [file 12864_2015_1310_MOESM6_ESM.pdf]

# SNP-SNP

All variants: 36,140,217

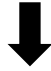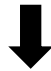

9,643,836

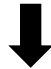

1,704,226



1,079,658 Pairs (754,931 critical SNPs)

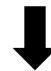

954,709

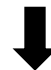

39,522

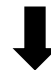

Candidates submitted: 7,764

## Pipeline steps

1. Min. variant read count (x=3).
2. SNPs only.
3. “Critical” SNP presence: all HD-16.
4. Identify SNP-SNP pairs in HD-16: “critical” SNP coupled to marker SNP.
5. Critical SNP presence/absence check.
6. SNP-SNP association check.
7. 24 +/- free of other variants.
