# Supplementary material for: Development and preliminary evaluation of a 90 K Axiom® SNP array for the allo-octoploid cultivated strawberry Fragaria × ananassa
Source: PubMed Central journal article supplement (PMC4374422; doi:10.1186/s12864-015-1310-1), 2015-03-07
Supplement: 12864_2015_1310_MOESM7_ESM.pdf [file 12864_2015_1310_MOESM7_ESM.pdf]

# Indel-SNP

## Pipeline steps

All variants: 36,140,217

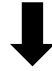

1. Min. variant read count (x=3).

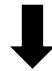

2. Indels only.

1,193,870

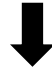

3. Indel size >3 bp.

208,460

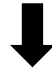

4. Critical indel presence: all HD-16.

7,199

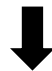

5. Identify indel-SNP pairs in HD-16:  
“critical” indel coupled to marker SNP.

13,301 Pairs (6,640 critical indels)

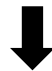

6. Critical indel presence/absence check.

12,753

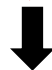

7. Indel-SNP association check.

Candidates submitted: 2,937

# The Indel-SNP Association Check

(+) Ref: the Indel form different from the Reference

cYsN (+ -)     = 0 must be in at least 2 samples     reads sum  $\geq 3$   
cYsY (+ +)     reads sum  $\geq 3$   
cNsN (- -)  
cNsY (- +)

(-) Ref: the Indel form identical to the Reference

cYsN (+ -)  
cYsY (+ +)  
cNsN (- -)     = 0 must be in at least 2 samples     reads sum  $\geq 3$   
cNsY (- +)     reads sum  $\geq 3$

This filter is found to be the strongest constraint. It eliminates the majority of the candidates.

Note:

c : Critical Indel; s : Marker SNP

**A less stringent setting is used:  
2 samples → 1 samples**
