# Supplementary material for: Development and preliminary evaluation of a 90 K Axiom® SNP array for the allo-octoploid cultivated strawberry Fragaria × ananassa
Source: PubMed Central journal article supplement (PMC4374422; doi:10.1186/s12864-015-1310-1), 2015-03-07
Supplement: 12864_2015_1310_MOESM8_ESM.pdf [file 12864_2015_1310_MOESM8_ESM.pdf]

# SNP-in-Insertion

## Case 1:

A G C T G A [ \_ \_ \_ \_ \_ ] G C T T G      (REFERENCE)  
A G C T G A [ A A C T A ] G C T T G  
A G C T G A [ A A G T A ] G C T T G  
(INSERTION with respect to reference)

## Case 2:

A G C T G A [ \_ \_ \_ \_ \_ ] G C T T G  
(DELETION with respect to the reference)  
A G C T G A [ A A G T A ] G C T T G      (REFERENCE)  
A G C T G A [ A A C T A ] G C T T G

# SNP-in-Insertion (Case 1)

All variants: **36,140,217**

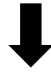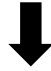

**931,096**

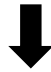

**188,146 (107,831 unique positions)**

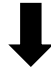

**55,399**



**14,430**

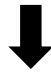

**17,129**

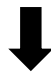

**4,631**

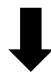

Candidates submitted: **2,743**

## Pipeline steps

1. Min. variant read count ( $x = 3$ ).
2. Insertion(s) present at variant site.
3. Insert(s) size(s)  $>3$  bp.
4. Positions with multiple, distinct insertions.
5. Insertion sites that contain SNPs.
6. Enumerate insertion pairs that form SNP.
7. Insertion and deletion forms must have at least 3 reads to support.
2. Insertion and deletion forms present in all HD-16.

## SNP-in-Insertion (Case 2)

All variants: 36,140,217

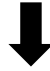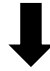

1,193,870

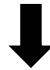

208,460

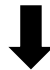

7,199

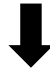

19,032

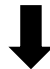

5,731

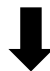

Candidates submitted: 2,178

### Pipeline steps

1. Min. variant read count ( $x = 3$ ).
2. Indels only.
3. Indel size  $>3$  bp.
4. Critical indel presence: all HD-16.
5. SNP within 14 bp of critical insertion.
6. SNPs within critical insertion.
7. SNP absent in at least one of HD-16.
