# Supplementary material for: Development and preliminary evaluation of a 90 K Axiom® SNP array for the allo-octoploid cultivated strawberry Fragaria × ananassa
Source: PubMed Central journal article supplement (PMC4374422; doi:10.1186/s12864-015-1310-1), 2015-03-07

**A**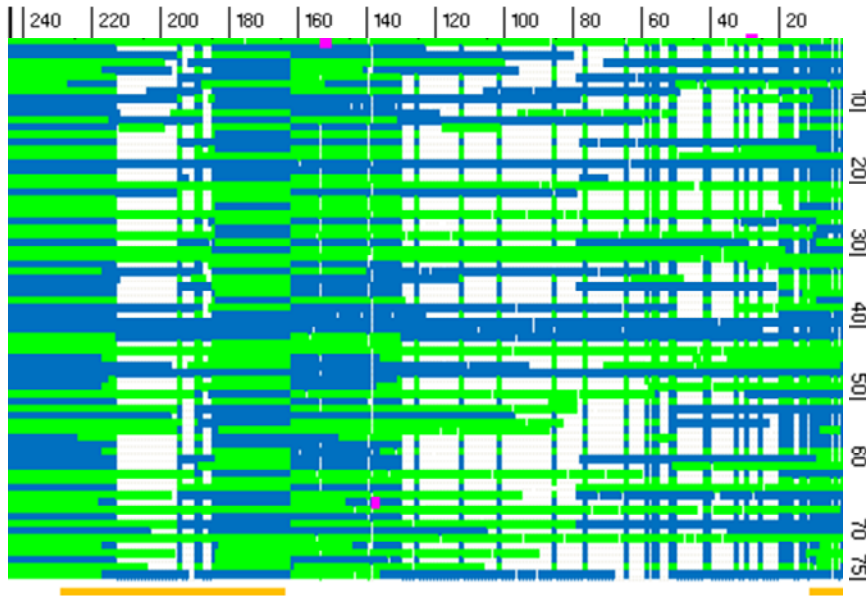**B**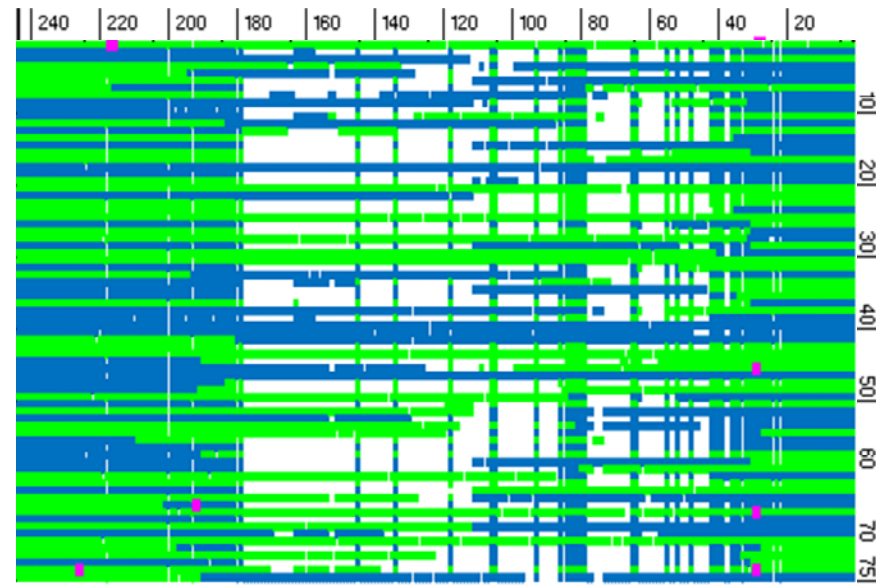**C**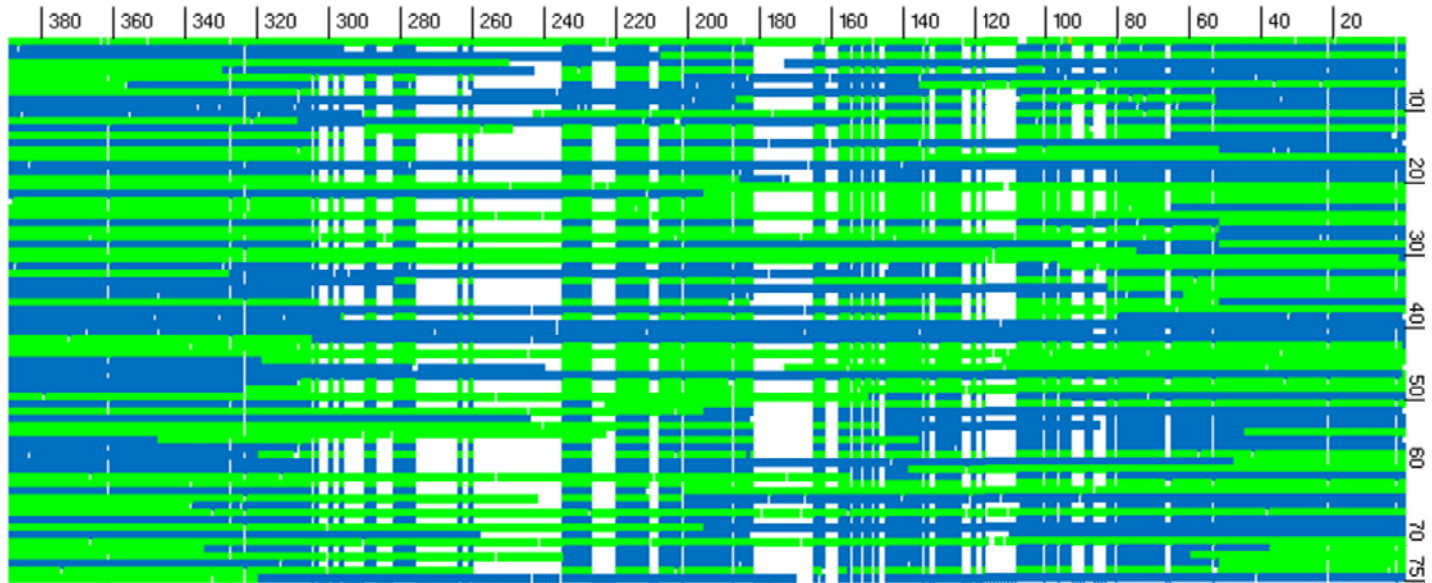

Supplement: 12864_2015_1310_MOESM13_ESM.pdf [file 12864_2015_1310_MOESM13_ESM.pdf]
