# Supplementary material for: Development and preliminary evaluation of a 90 K Axiom® SNP array for the allo-octoploid cultivated strawberry Fragaria × ananassa
Source: PubMed Central journal article supplement (PMC4374422; doi:10.1186/s12864-015-1310-1), 2015-03-07

### *OTV-4*

AX-89871559  
AvM - called genotypes

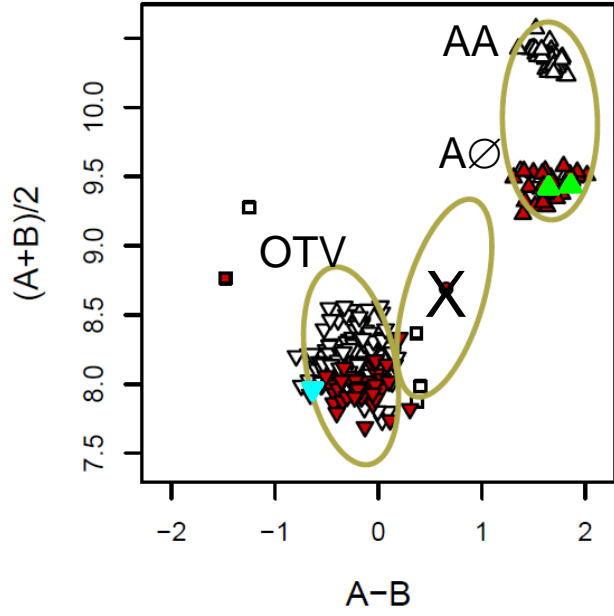

### *OTV-5*

AX-89896961  
AvM - called genotypes

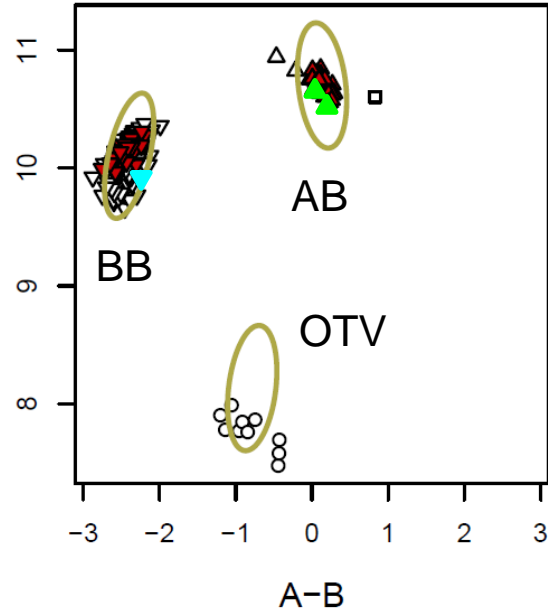

### *OTV-6*

AX-89897092  
AvM - called genotypes

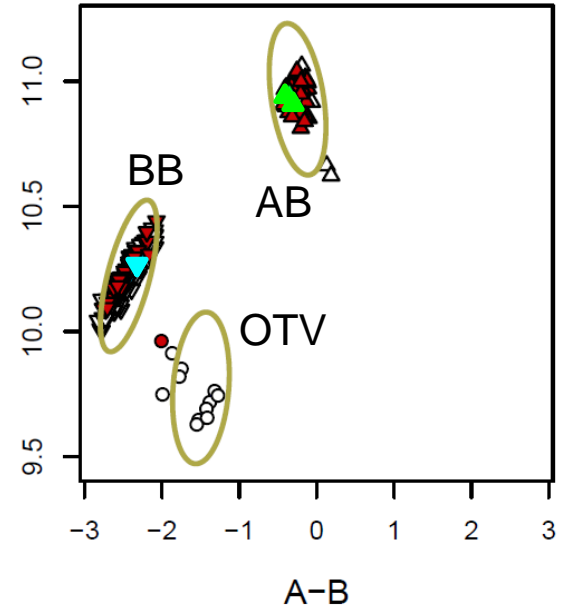

Supplement: 12864_2015_1310_MOESM15_ESM.pdf [file 12864_2015_1310_MOESM15_ESM.pdf]
